# Supplementary material
Source: PubMed Central journal article supplement (PMC7116005)
Supplement: EMS86706-supplement-Supplementary_Figures.pdf [file EMS86706-supplement-Supplementary_Figures.pdf]

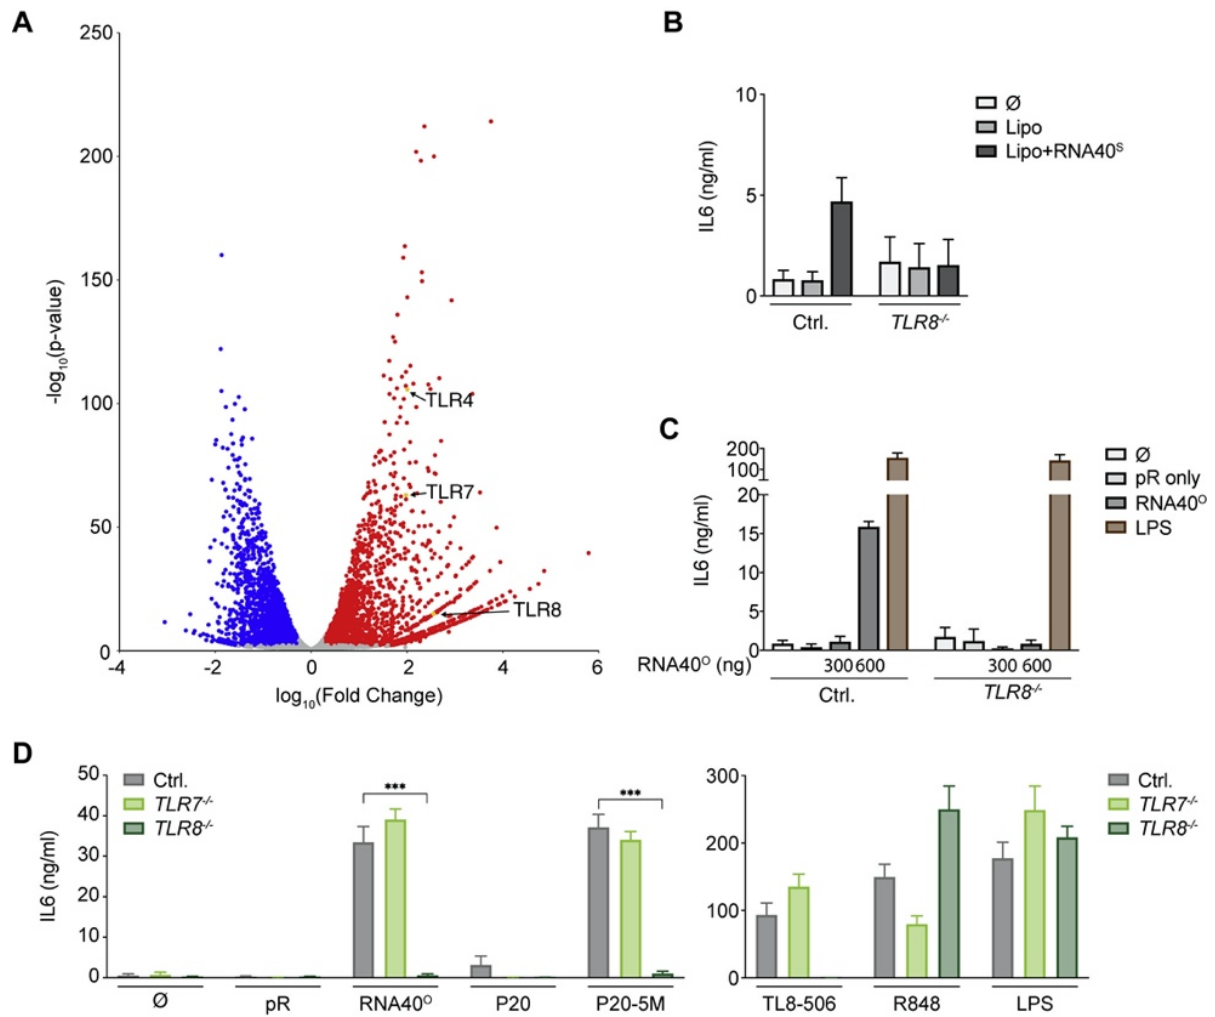

**Figure S1.** Characterization of TLR7 and TLR8 in BLaER1 Monocytes, Related to Figure 1

**(A)** Volcano plot showing gene expression differences of differentiated versus un-differentiated BLaER1 cells. The negative  $\log_{10}$  p-values (y axis) are plotted against the  $\log_{10}$  fold changes in gene expression (x axis). Significantly (adjusted p-value < 0.05 and absolute fold change > 2) upregulated genes are highlighted in red, downregulated genes are highlighted in blue. TLR4, 7 and 8 are specifically highlighted. **(B)** BLaER1 Ctrl. and *TLR8*<sup>-/-</sup> cells were stimulated using Lipofectamine 2000 with and without RNA40<sup>s</sup>. **(C)** BLaER1 cells were stimulated with different amounts of RNA40<sup>o</sup>. The unstimulated control shown in (B) and (C) is the same as in Figure 1D, as it is derived from the same experiment. **(D)** Different RNAs were tested for TLR8 activation. P20 is a self-complementary RNA forming hairpins, whereas P20-5M is only a partially self-complementary RNA. Data are depicted as mean + SEM of three (B and C) or four (D) independent experiments. Statistics indicates significance by two-way ANOVA: \*\*\*p ≤ 0.001, \*\*p ≤ 0.01, \*p ≤ 0.05, ns = not significant.

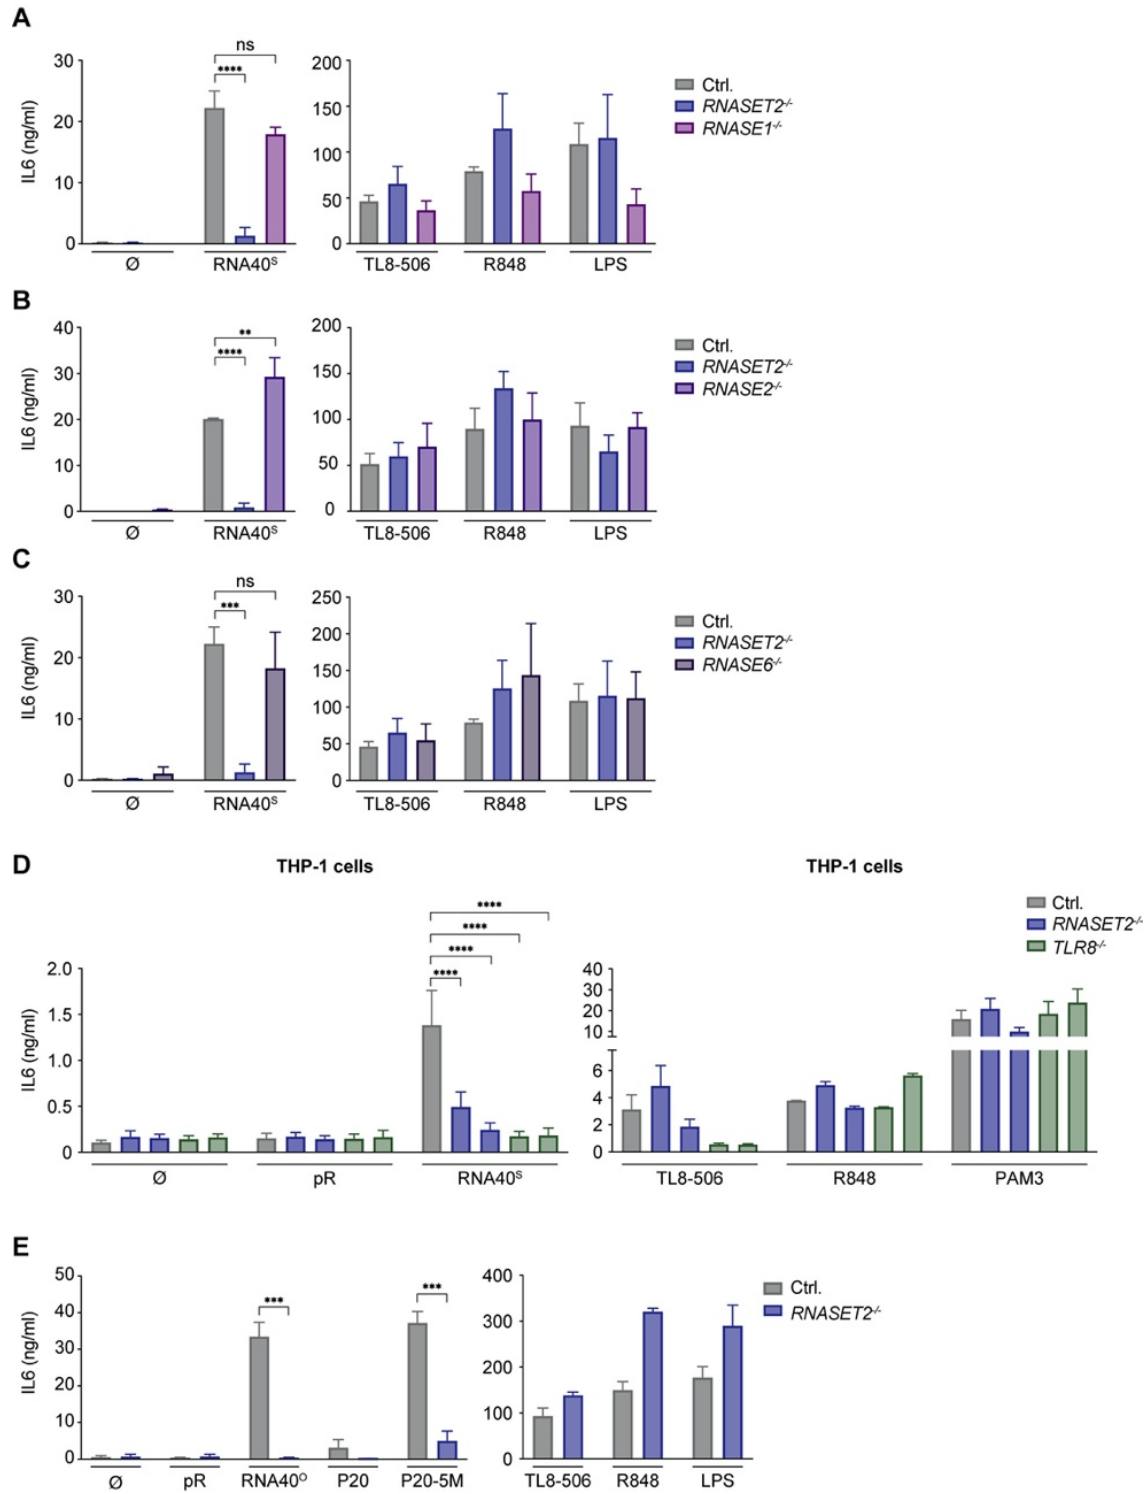

**Figure S2.**  $RNASE1^{-/-}$ ,  $RNASE2^{-/-}$ , and  $RNASE6^{-/-}$  Cells Show No Reduced Response to RNA40 Stimulation, Related to Figure 2

**(A–C)** BLAER1 control,  $RNASE1$ ,  $RNASE2$  and  $RNASE6$ -deficient cells were stimulated with RNA40<sup>S</sup>, TL8-506, R848 and LPS. Controls are identical for  $RNASE1^{-/-}$  and  $RNASE6^{-/-}$  cells as they derive from the same experiment. **(D)** THP-1 wild type,  $RNASE2^{-/-}$  and  $TLR8^{-/-}$  cells were stimulated as indicated. **(E)** BLAER1 control and  $RNASE2^{-/-}$  cells were stimulated as indicated. Data of Ctrl. cells are identical to the ones in Figure S1D as they derive from the same experiment. Data are depicted as mean + SEM of three (A–D) or four (E) independent experiments. Statistics indicates significance by two-way ANOVA: \*\*\*\* $p \leq 0.0001$ ; \*\*\* $p \leq 0.001$ , \*\* $p \leq 0.01$ , \* $p \leq 0.05$ , ns = not significant.

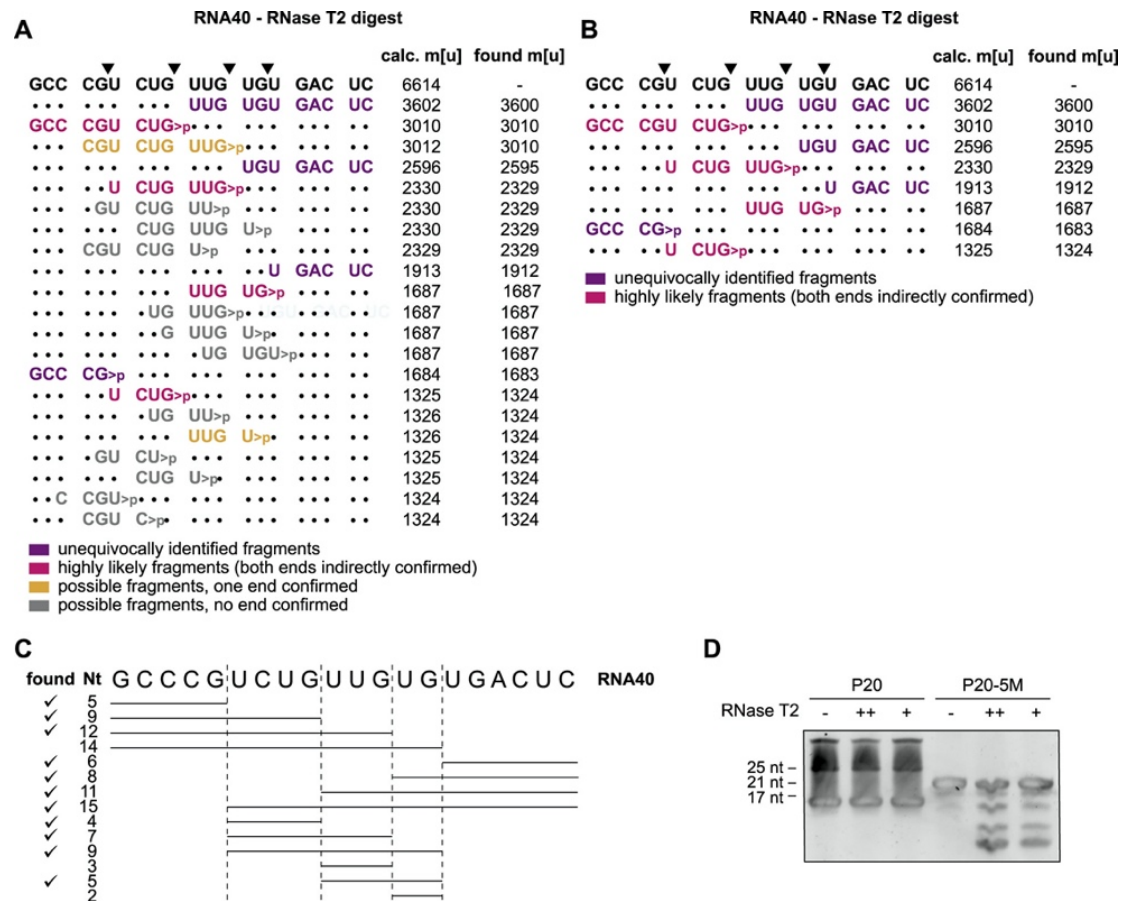

**Figure S3.** Identifying Possible RNase T2 Degradation Products by *In Vitro* Digestion of RNA40, Related to Figure 3

(A) List of all possible fragments associated with the *in vitro* digest of RNA40<sup>s</sup> with RNase T2, analyzed by HPLC/MALDI-TOF. All found and calculated ([M-H]<sup>-</sup>) masses are shown. The color code refers to the probability that fragments could be assigned to the one depicted. (B) Most likely hits of RNA40<sup>s</sup> digested with RNase T2 based on the analysis from (A). (C) Assuming RNase T2 is only capable of cleaving RNA40 between G and U residues, all possible fragments are depicted. The ticks indicate which of these fragments could be confirmed by HPLC/MALDI-TOF. (D) Urea gel of *in vitro* digested RNA P20 and P20-5M with RNase T2. P20 is a self-complementary RNA fragment and forms hairpins, whereas P20-5M is only partially self-complementary RNA. One representative gel of two independent experiments is shown.

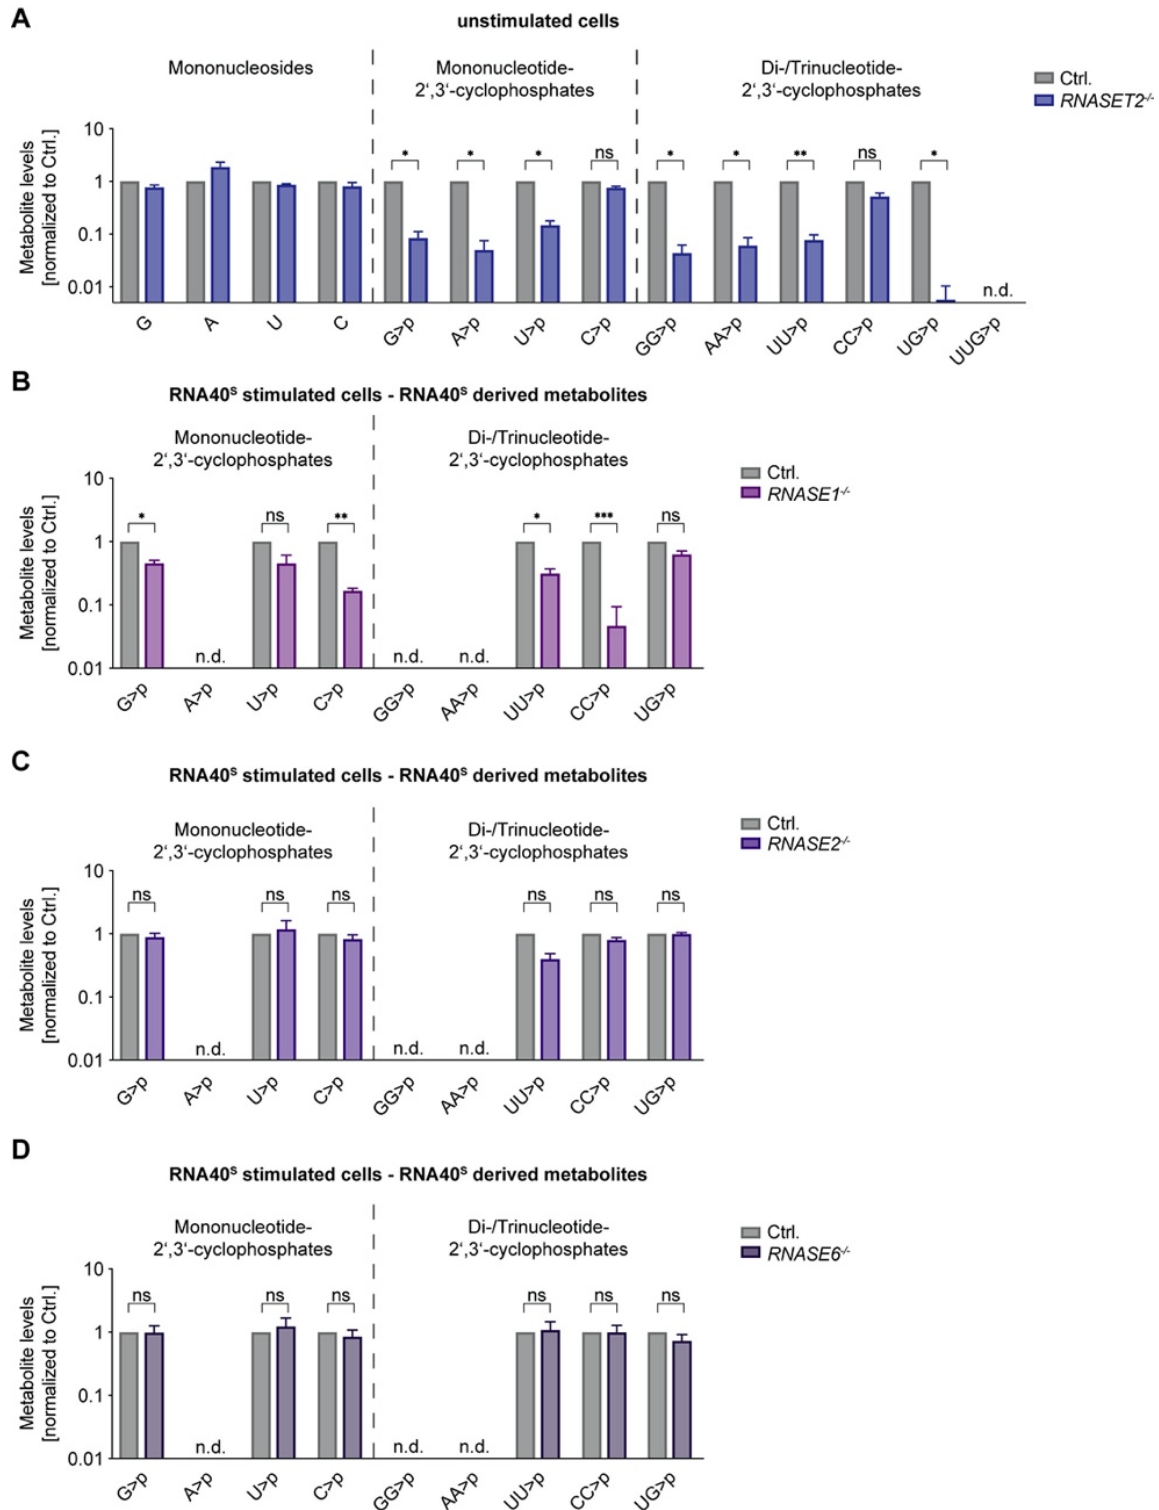

**Figure S4.** Cells Deficient in RNase A Family Enzymes Show Different RNA40 Catabolism in Comparison with *RNASE2*<sup>-/-</sup> Cells, Related to Figure 4

**(A)** Whole cell lysate of unstimulated BLaER1 cells with indicated genotypes were analyzed by LC-MS. Data are normalized to Ctrl. cells (note logarithmic scale). **(B–D)** Whole cell lysate of control, *RNASE1*<sup>-/-</sup>, *RNASE2*<sup>-/-</sup> and *RNASE6*<sup>-/-</sup> BLaER1 cells stimulated with RNA40<sup>s</sup> was analyzed by LC/MS (14 h after stimulation). RNA40<sup>s</sup> derived metabolites are shown. Data are normalized to Ctrl. cells (note logarithmic scale). Data are depicted as mean + SEM of three independent experiments. Statistics indicates significance by a Welch's unequal variances t test. \*\*\*p ≤ 0.001, \*\*p ≤ 0.01, \*p ≤ 0.05; ns, not significant; n.d., not detected.

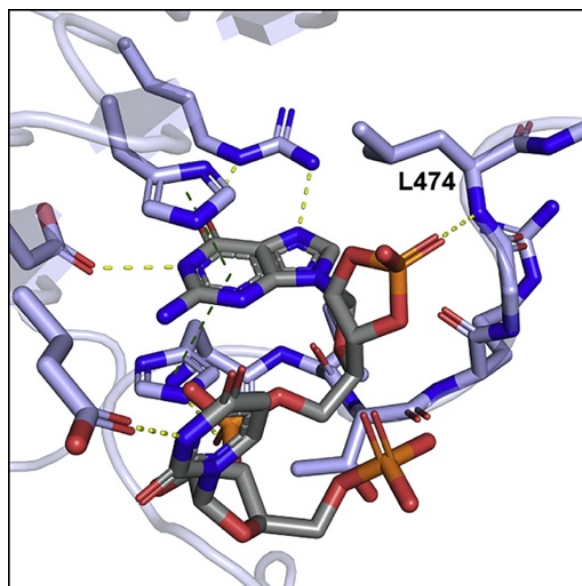

**Figure S5.** Crystal Structure of the Second Pocket of TLR8, Related to Figure 5

Crystal structure of the second pocket of TLR8 bound to UG (PDB, 4R07). Yellow dashed lines indicate hydrogen bonds whereas green dashed lines show  $\pi$ - $\pi$ -interactions. The atoms are color coded as follows: nitrogen, blue; oxygen, red; phosphor, orange; carbon, light blue and gray.

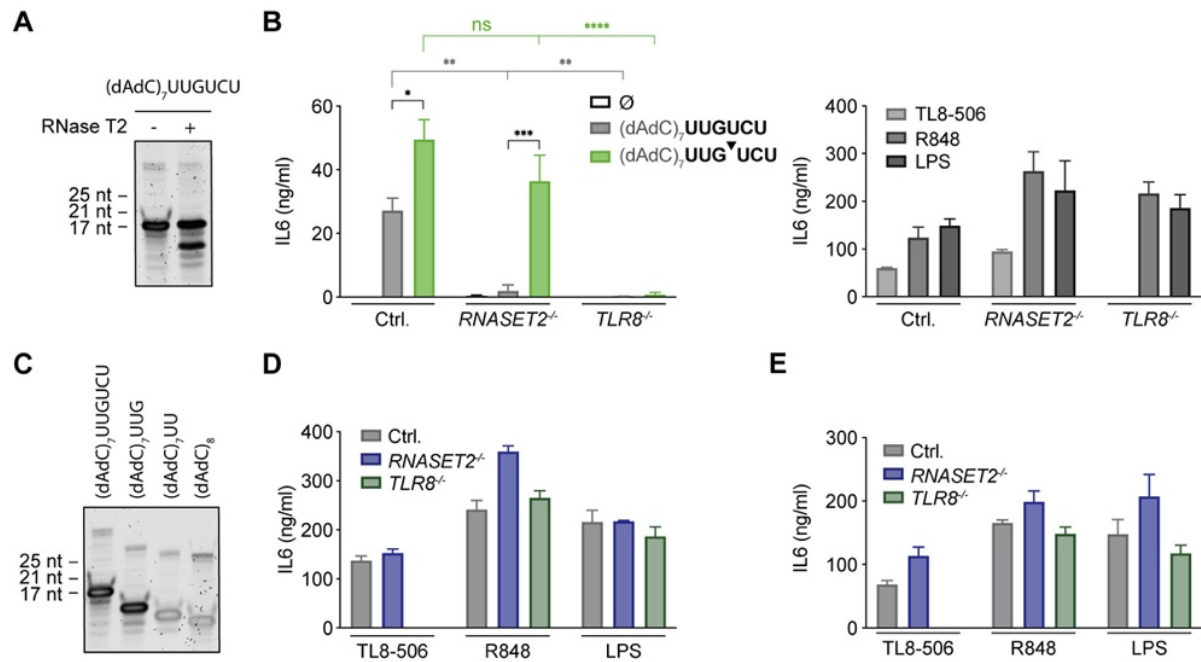

**Figure S6.** RNase T2 Degradation Products Bypass the Lack of RNase T2, Related to Figure 6

**(A)** Urea gel of full-length and RNase T2 digested (dAdC)<sub>7</sub>UUGUCU. **(B)** BLaER1 cells of indicated genotypes were stimulated with either digested or undigested (dAdC)<sub>7</sub>UUGUCU (0.9 µg/condition) and the indicated controls. **(C)** Urea gel of the following full-length ONs: (dAdC)<sub>7</sub>UUGUCU, (dAdC)<sub>7</sub>UUG, (dAdC)<sub>7</sub>UU and (dAdC)<sub>8</sub>. **(D)** Control stimulation of BLaER1 cells associated with (Figure 6G). **(E)** Control stimulation of BLaER1 cells associated with (Figure 6H). Data are depicted as mean + SEM of three independent experiments or one of two representative gels is shown. Statistics indicates significance by two-way ANOVA. \*\*\*\*p ≤ 0.0001; \*\*\*p ≤ 0.001, \*\*p ≤ 0.01, \*p ≤ 0.05, ns = not significant.

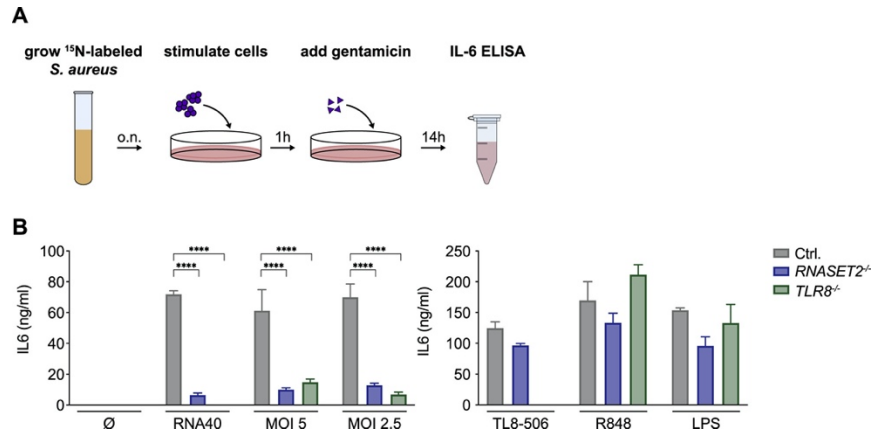

**Figure S7.** <sup>15</sup>N-Labeled *S. aureus* Detection in Myeloid Cells Depends on RNase T2 Upstream of TLR8, Related to Figure 7

**(A)** Schematic overview of experimental setup. *S. aureus* was grown in <sup>15</sup>N-labeled medium, harvested and used to stimulate differentiated BLAER1 cells. 1 h after infection gentamicin was added and another 14 h later IL-6 release was measured by ELISA. **(B)** Stimulation of BLAER1 cells with different MOI of <sup>15</sup>N-labeled *S. aureus*. Data are depicted as mean + SEM of three independent experiments. Statistics indicates significance by two-way ANOVA. \*\*\*\**p* ≤ 0.0001; \*\*\**p* ≤ 0.001, \*\**p* ≤ 0.01, \**p* ≤ 0.05, ns = not significant.
